# Supplementary material for: The SnRK2-APC/CTE regulatory module mediates the antagonistic action of gibberellic acid and abscisic acid pathways
Source: PubMed Central journal article supplement (PMC4557272; doi:10.1038/ncomms8981), 2015-08-14
Supplement: ncomms8981-s1.pdf [file ncomms8981-s1.pdf]

## Supporting Information

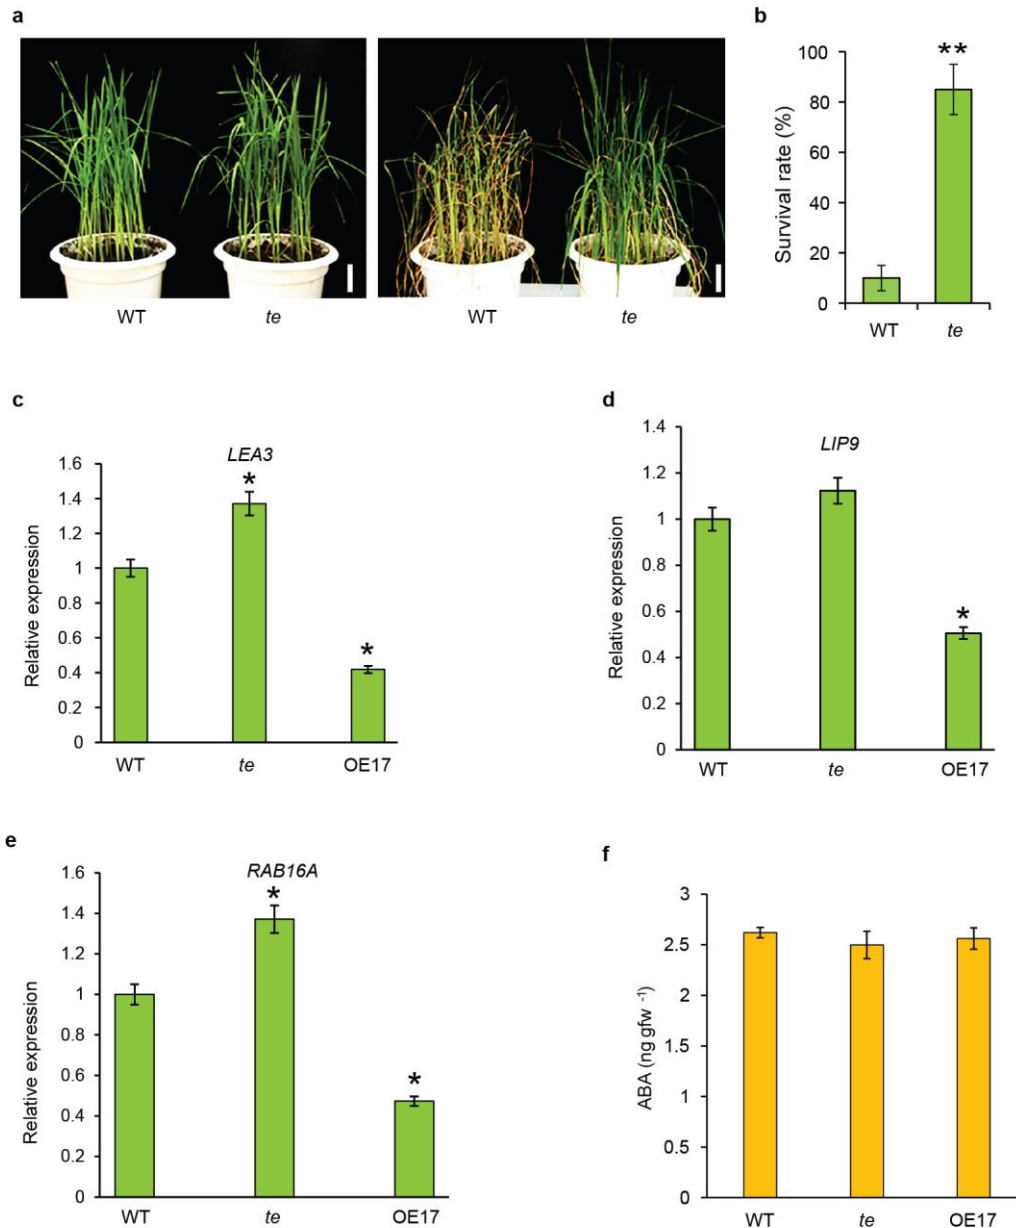

### Supplementary Figure 1

#### The *te* mutant shows enhanced ABA responses.

(a) Enhanced tolerance to drought of *te* plants. Water was withheld from 3-week-old plants for 10 days, then the photograph was taken. The left and right panel show the seedlings before and after dehydration, respectively. Scale bars, 5 cm. (b) Increased survival rates of *te* plants under drought stress, compared to wild type plants (WT). Water was withheld for 10 days from 3-week-old plants and then the survivorship was counted. Values are means  $\pm$  s.d. (n=30 seedlings). (c-e) The expression of *LEA3* (c), *LIP9* (d) and *RAB16A* (e) in WT, *te* and OE17 plants. (f) Measurement of ABA levels in WT, *te* and OE17 plants. Values are means  $\pm$  s.d. (n=3 replicates) in b-f. All plants in c-f are one-week-old. Student's *t*-test analysis indicated a significant difference (compared to WT, \*P<0.05, \*\*P<0.01) in b-e. gfw, gram fresh weight.

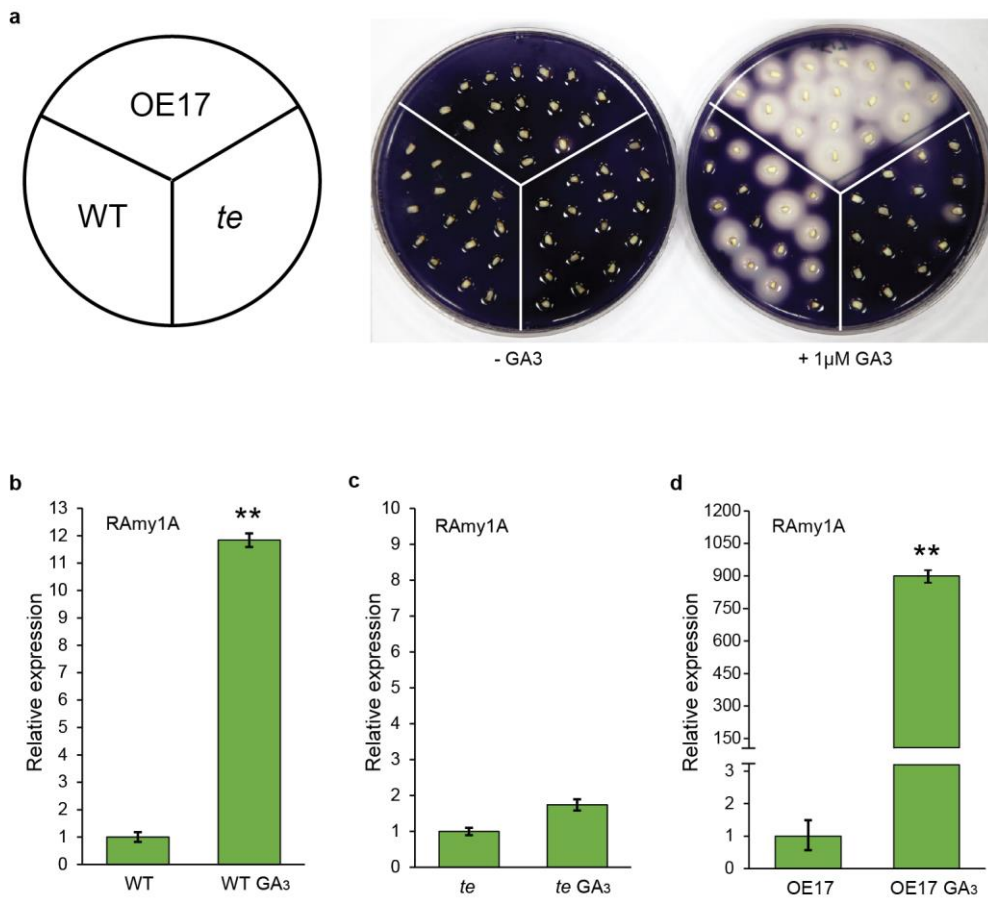

## Supplementary Figure 2

### The *te* mutant exhibits reduced sensitivity to GA.

(a) 1  $\mu\text{M}$  GA<sub>3</sub> more effectively induces  $\alpha$ -amylase secretion by OE17 and wild type (WT) than by *te* half seeds, as shown by the degradation of starches in the medium in these  $\alpha$ -amylase assays. The half seeds were plated on medium for three days at 30 °C. (b-d) Treatment with 100  $\mu\text{M}$  GA<sub>3</sub> for 12 hours effectively induces the expression of  $\alpha$ -amylase gene *RAmy1A* in WT and OE17 plants but not in *te* plants. Values are means  $\pm$  s.d. (n=3 replicates). Student's *t*-test analysis indicates a significant difference (compared with control, \*\*P<0.01).

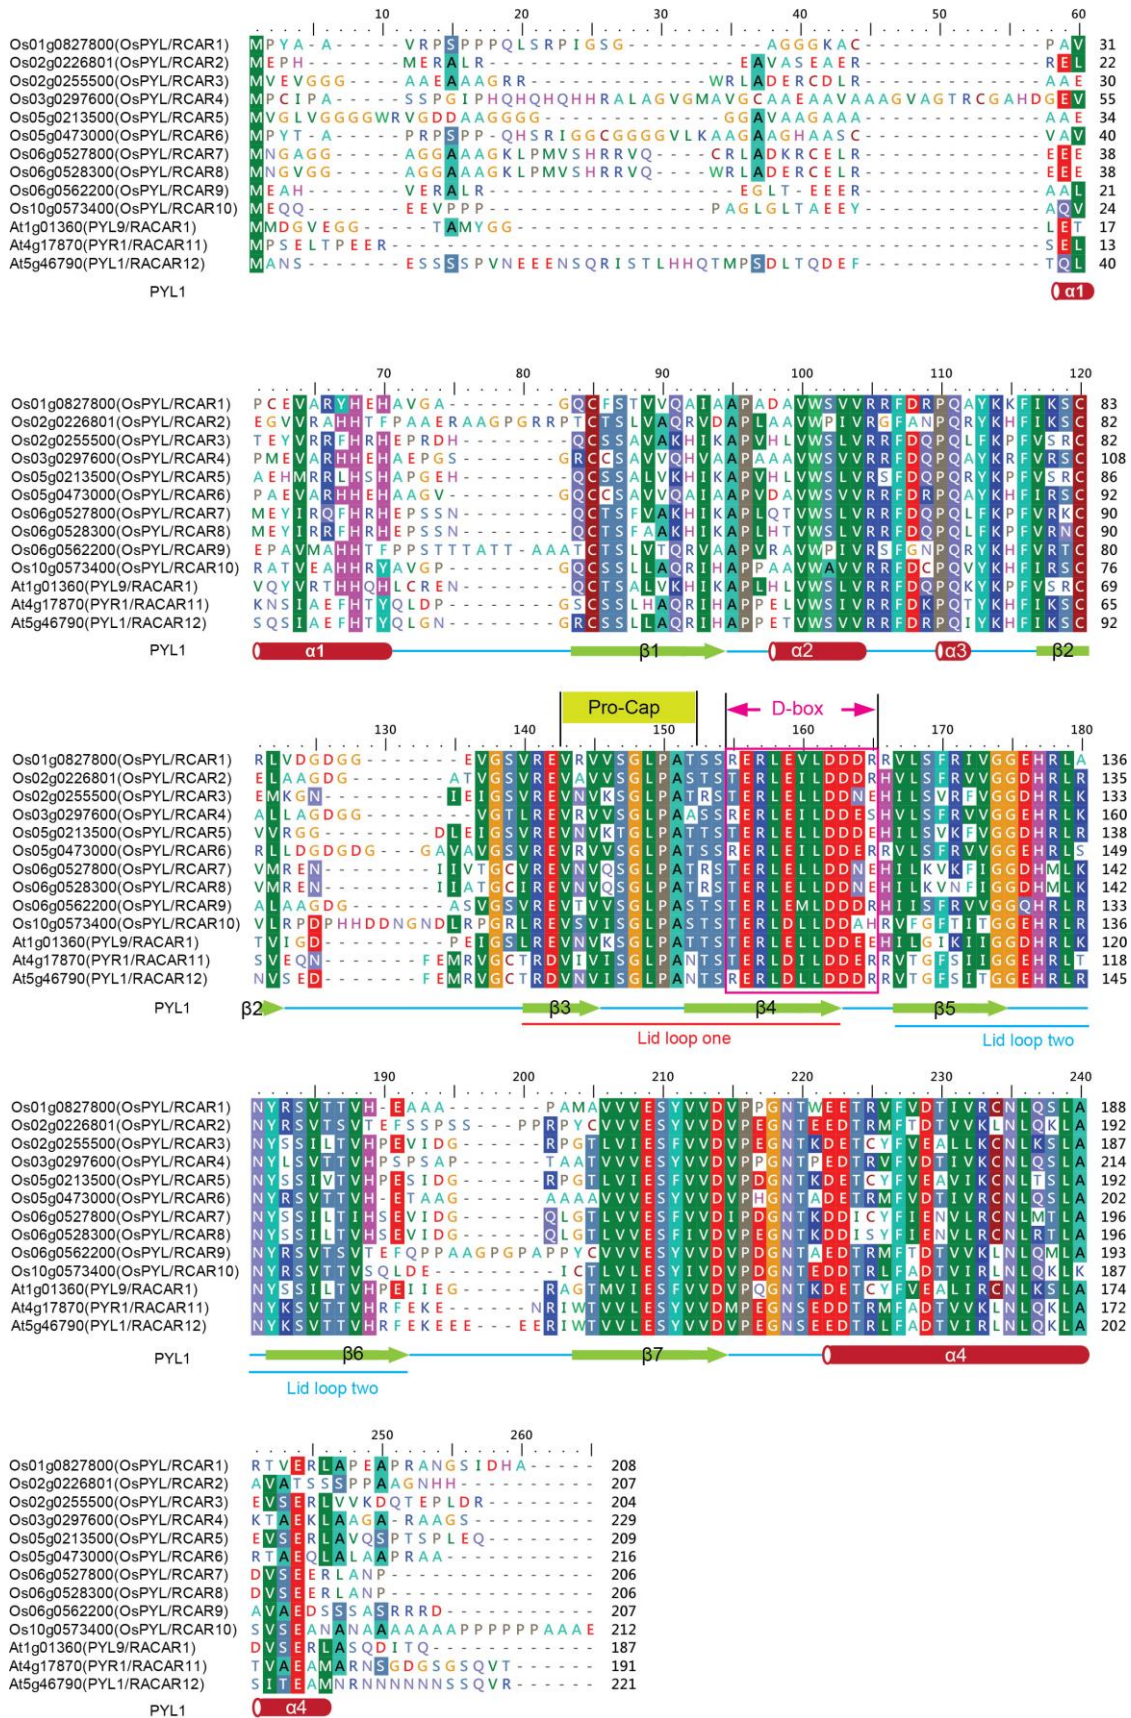

### Supplementary Figure 3

#### Alignment of PYR/PYL/RCAR proteins.

Alignment of 10 rice PYR/PYL/RCAR proteins and 3 Arabidopsis PYR/PYL/RCAR proteins shows the conserved three-dimensional structural motifs. In addition, the conserved D-box mainly located in Lid loop one (composed of  $\beta 3$  and  $\beta 4$ ) is shown.

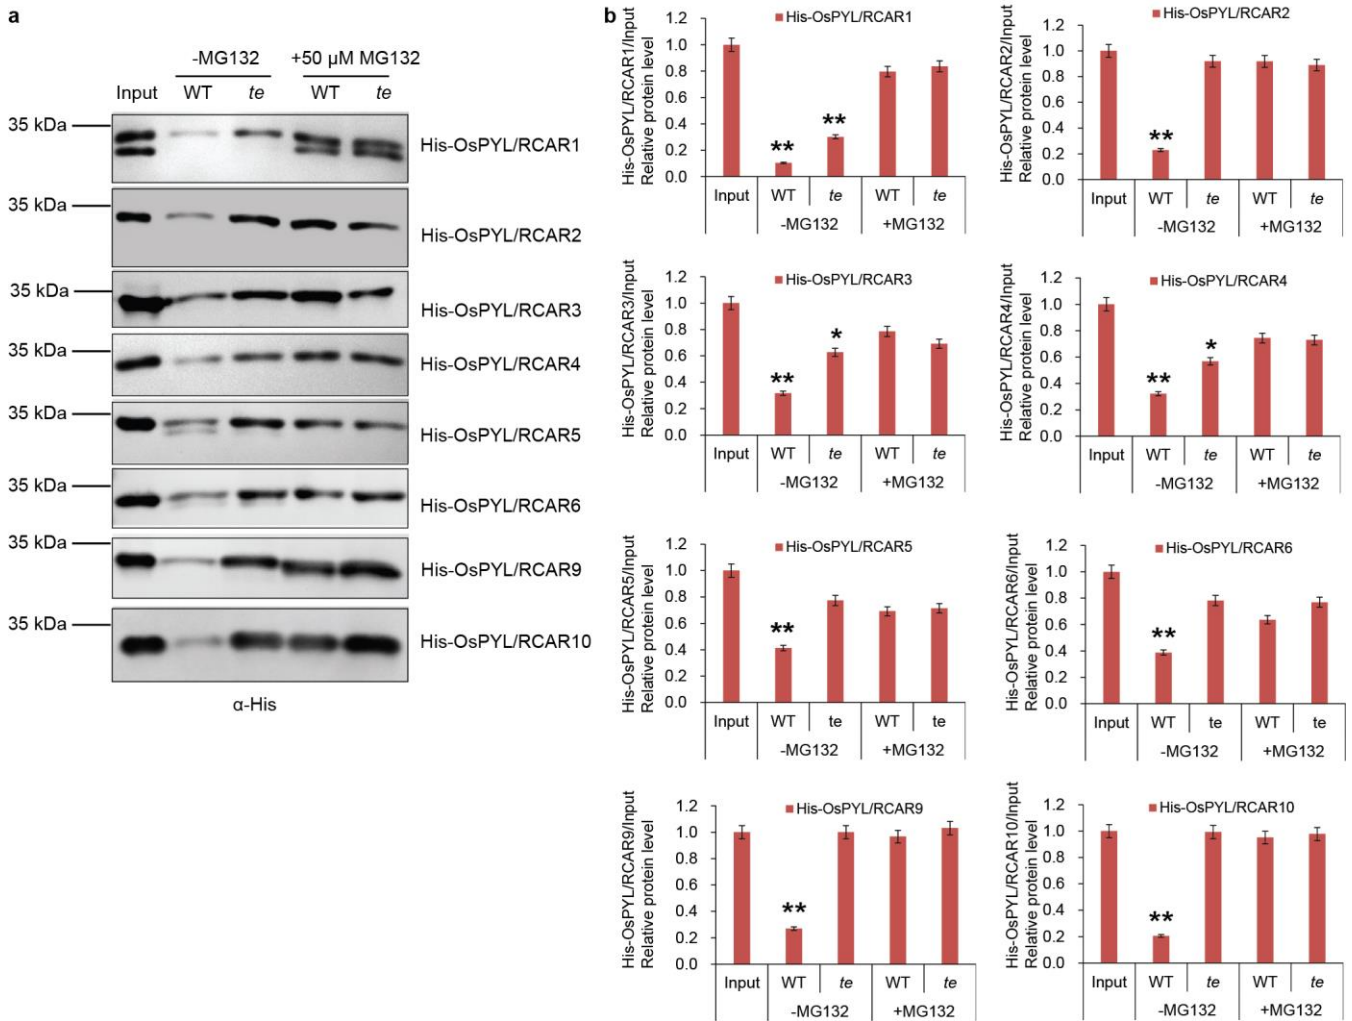

#### Supplementary Figure 4

##### Cell-free degradation assays of eight OsPYL/RCAR proteins.

(a) The eight His-OsPYL/RCAR proteins remained relatively stable after 1 hour in *te* plant extracts, compared to in wild type (WT) plant extracts. 50  $\mu$ M MG132 effectively inhibited the degradations of eight His-OsPYL/RCAR proteins in WT plant extracts. ‘Input’ shows the amounts of each His-OsPYL/RCAR protein used in the assay. (b) The quantification analysis of relative His-OsPYL/RCARs/Input protein levels corresponding to Figure a. Values are means  $\pm$  s.d. (n=3 replicates). Asterisks mark significant differences compared to Input according to Student’s t test (\* $P < 0.05$ , \*\* $P < 0.01$ ).

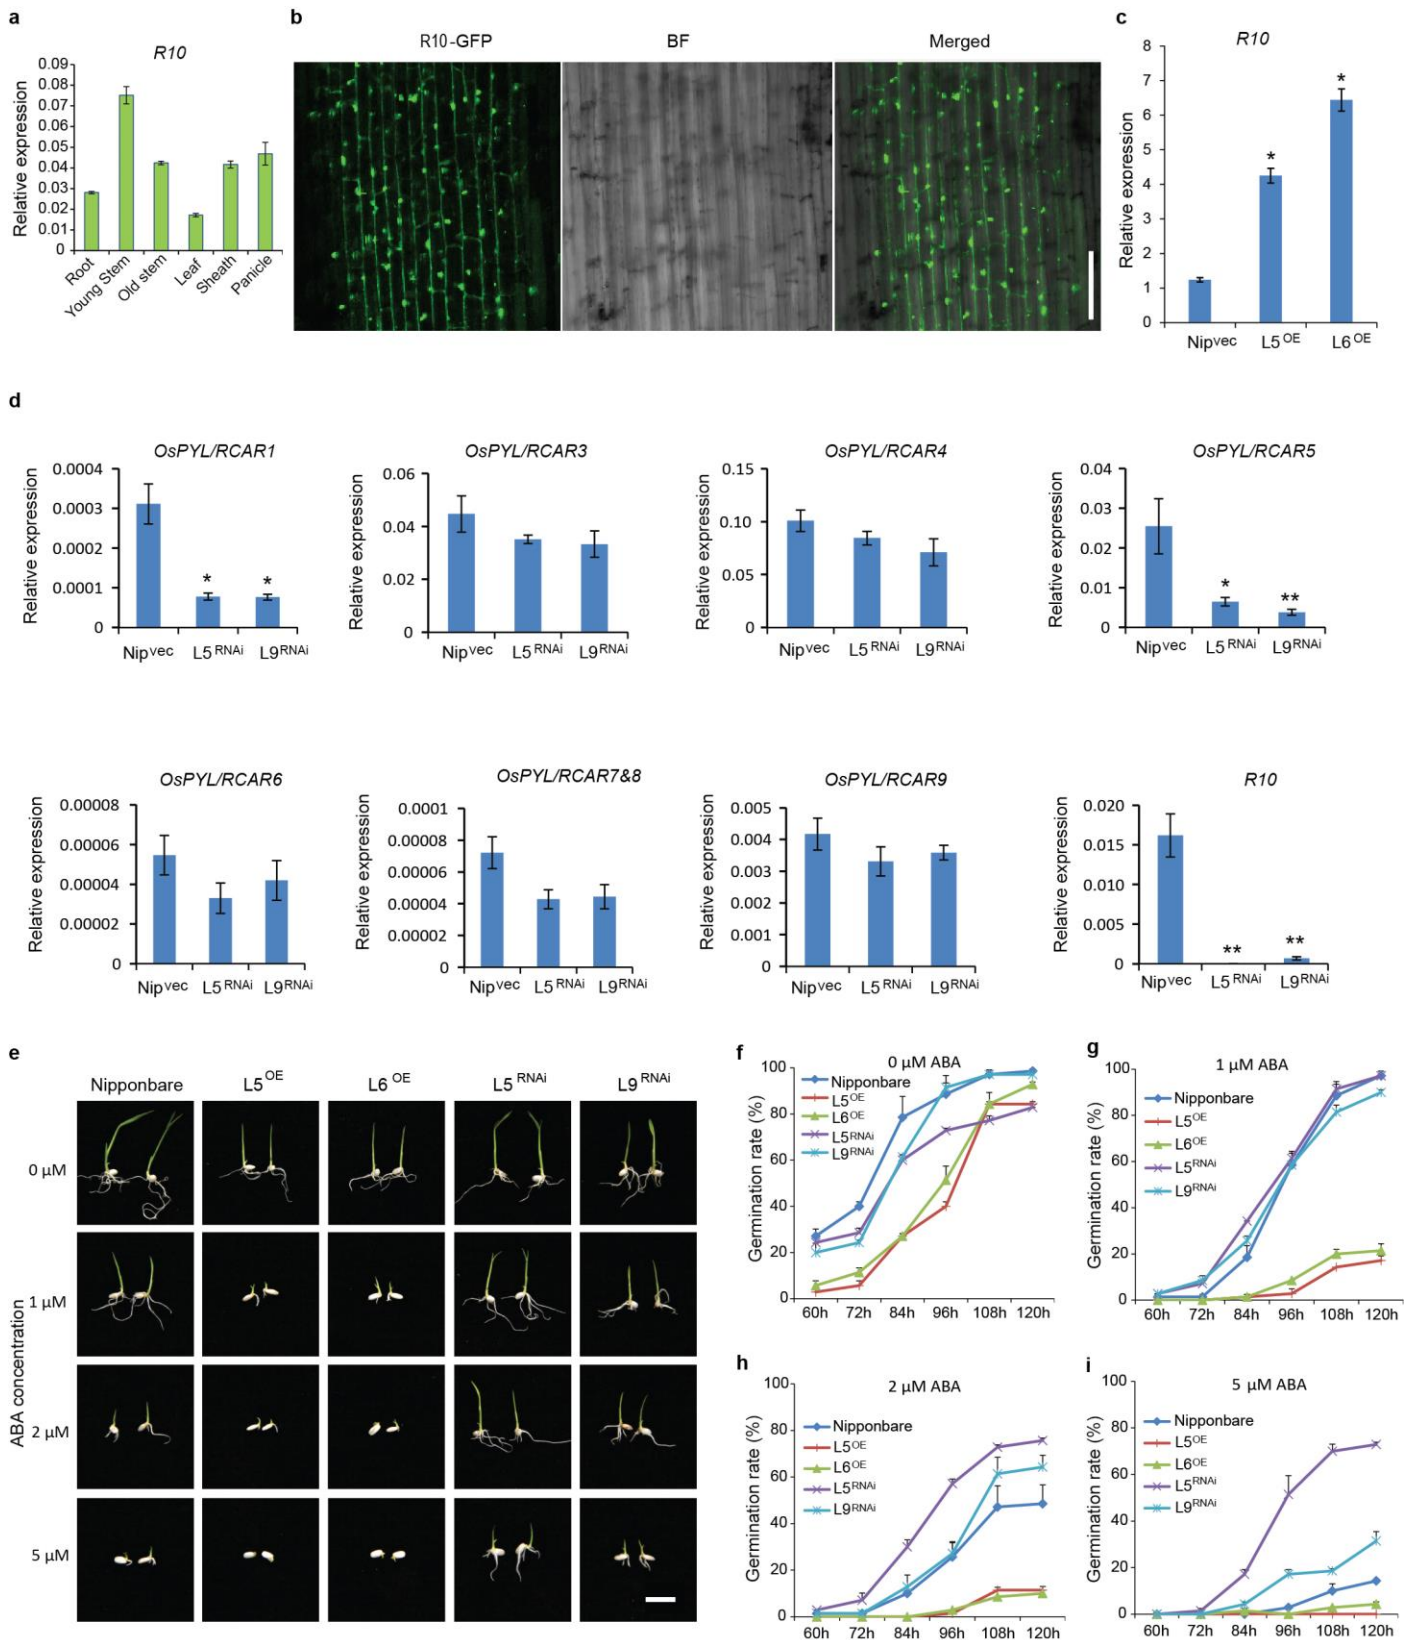

## Supplementary Figure 5 Functional analysis of *R10*.

(a) qRT-PCR analysis shows that *R10* is expressed in many rice tissues, including roots, young stems, old stems, leaves, sheaths and panicles. (b) The R10-GFP fusion protein is localized in both the nucleus and cytoplasm of rice root cells. BF, bright-field image. (c) qRT-PCR analysis shows that the expression of *R10*

is upregulated in *R10-GFP* overexpression line L5<sup>OE</sup> and L6<sup>OE</sup> compared to Nipponbare (Nip) vector control. **(d)** qRT-PCR analysis shows the relative expression level of *OsPYL/RCAR1*, *OsPYL/RCAR3*, *OsPYL/RCAR4-10* in *R10* RNAi line L5<sup>RNAi</sup> and L9<sup>RNAi</sup> compared to Nipponbare (Nip) vector control. **(e)** ABA inhibition of growth of Nipponbare, L5<sup>OE</sup>, L6<sup>OE</sup>, L5<sup>RNAi</sup> and L9<sup>RNAi</sup> seedlings. Seeds of Nipponbare, L5<sup>OE</sup>, L6<sup>OE</sup>, L5<sup>RNAi</sup> and L9<sup>RNAi</sup> were grown on MS medium containing 0, 1, 2, or 5  $\mu$ M ABA for 5 days. Photographs were taken on day 5. **(f-i)** Germination time courses on MS medium containing 0  $\mu$ M ABA **(f)**, 1  $\mu$ M ABA **(g)**, 2  $\mu$ M ABA **(h)**, or 5  $\mu$ M ABA **(i)**. Values are means  $\pm$  s.d. **(a, c and d)**, n=3 replicates; **f-i**, n=30 seedlings). Student's *t*-test analysis indicates a significant difference (compared with control, \*P<0.05, \*\* P<0.01). Scale bars, 100  $\mu$ m **(b)** and 1 cm **(e)**.

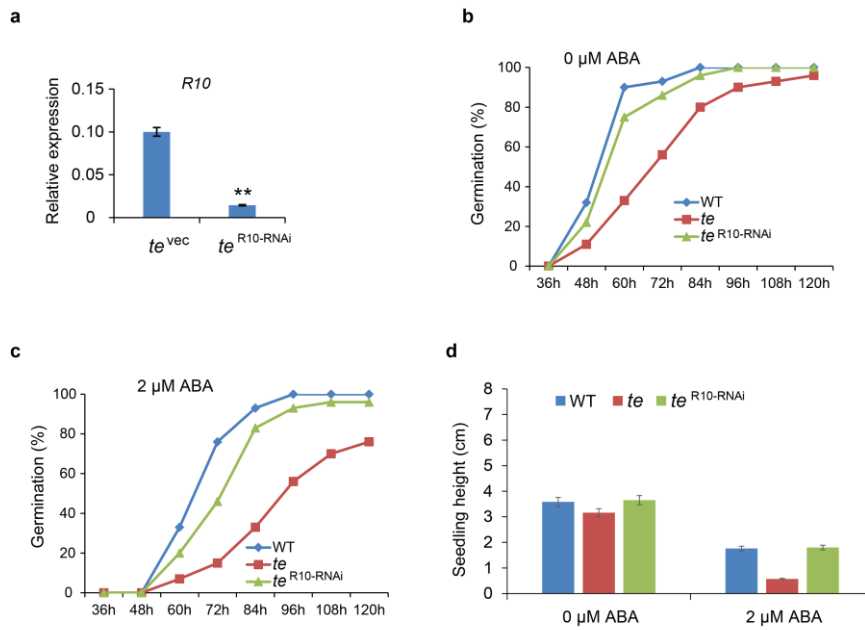

### Supplementary Figure 6

#### Characterization of the *R10* RNAi line in the *te* background.

(a) qRT-PCR analysis shows the relative expression level of the *R10* in *R10* RNAi line in the *te* background (*te*<sup>R10-RNAi</sup>) compared to the *te* vector control. Values are means ± s.d. (n=3 replicates). Student's *t*-test analysis indicates a significant difference (compared with control, \*\* P<0.01). (b and c) Germination time courses of WT, *te* and *te*<sup>R10-RNAi</sup> on MS medium containing 0 μM ABA (b) or 2 μM ABA (c). (d) Seedling heights of WT, *te* and *te*<sup>R10-RNAi</sup> grown for 5 days on MS medium containing 0 μM ABA or 2 μM ABA. Values are means ± s.d. in b-d (n=30 seedlings).

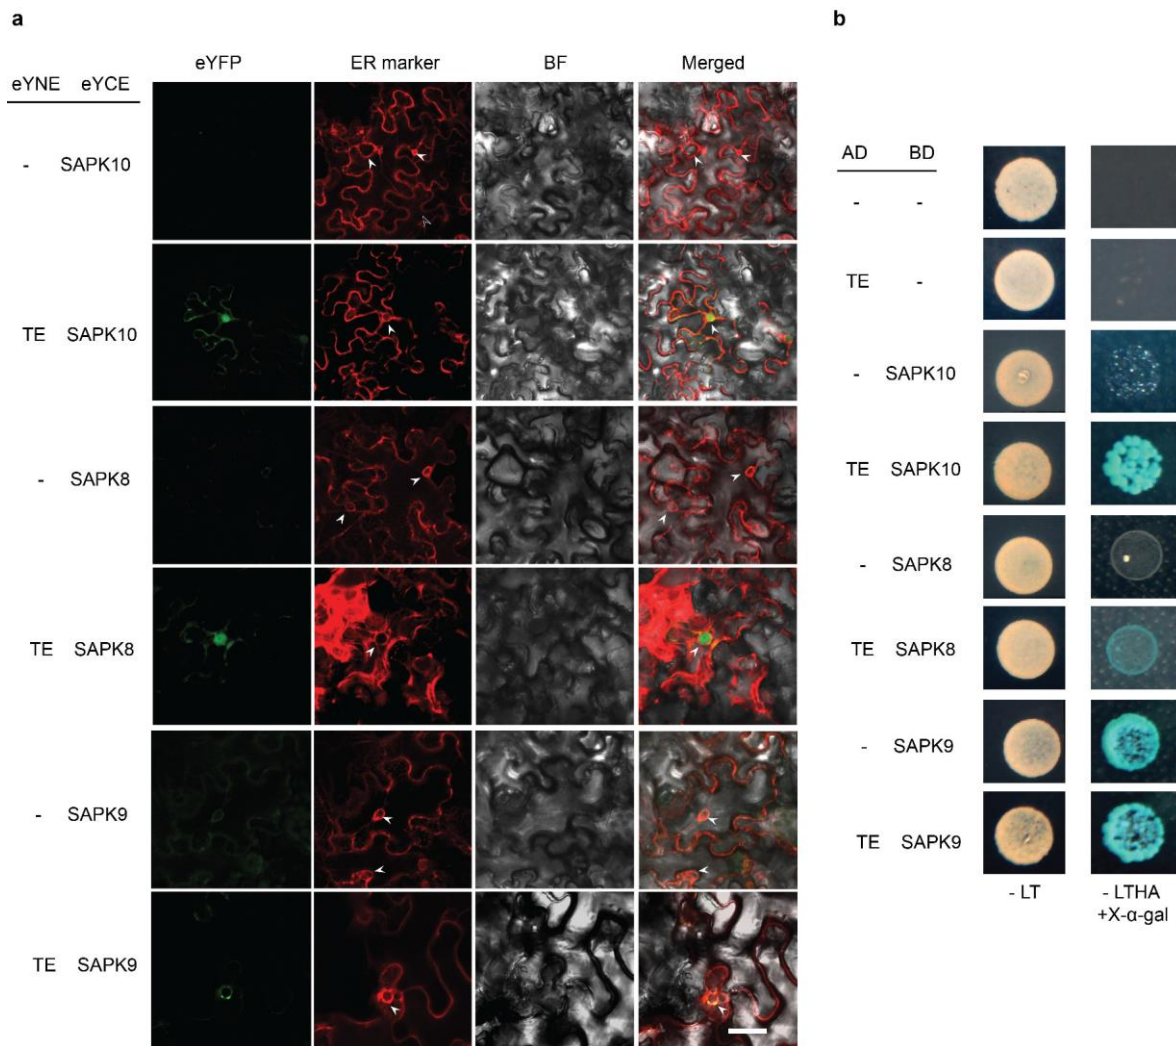

### Supplementary Figure 7

#### TE interacts with three rice SnRK2 proteins (SAPK10, SAPK8 and SAPK9) *in vivo*.

(a) BiFC analysis showing interactions between TE and SAPK10, SAPK8 or SAPK9 in *N. benthamiana* leaf epidermis cells. eYFP, eYFP fluorescence; ER marker, a fluorescent marker protein localized in endoplasmic reticulum; BF, bright-field image. White arrowheads indicate the nuclear membrane. Scale bar, 50  $\mu$ m. (b) Yeast two-hybrid assay shows that TE interacts with SAPK10 or SAPK8 but BD-SAPK9 shows strong auto-activation. Yeast transformants were plated on the control medium (SD-Leu/-Trp (-LT)) and selective medium (SD-Leu/-Trp/-His/-Ade plus X- $\alpha$ -gal) (-LTHA+X- $\alpha$ -gal). AD, activating domain; BD, binding domain; SD, synthetic dropout.



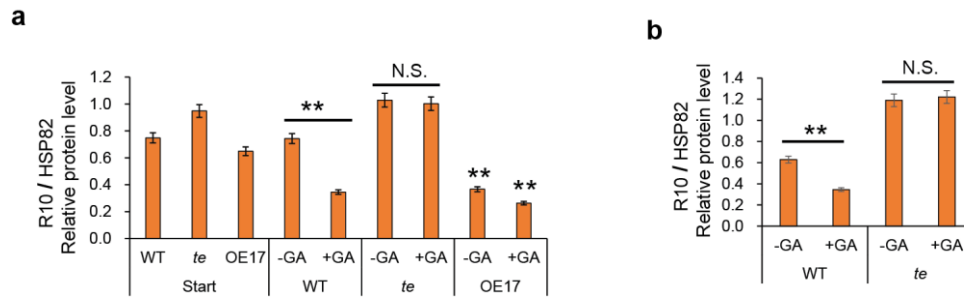

## Supplementary Figure 8

### The quantification analysis of relative R10/HSP82 protein levels

The quantification analysis of relative R10/HSP82 protein levels corresponding to Figure 4a (**a**) and Figure 4b (**b**). Note: in (**a**), the R10 protein level in OE17 seeds after 4h cycloheximide treatment (regardless of GA application) is notably less than that in OE17 seeds before treatment. Values are means  $\pm$  s.d. (n=3 replicates). Asterisks mark significant differences according to Student's t test (\*\*P < 0.01). N.S. =no significant.

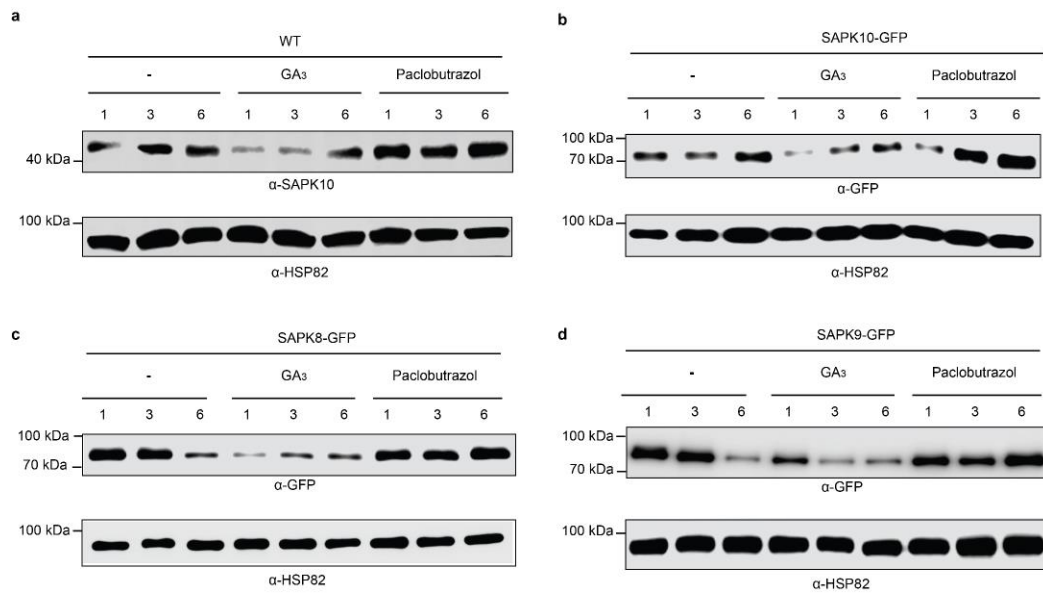

## Supplementary Figure 9

### Interruption of the GA signaling pathway stabilizes rice SnRK2 proteins.

(a) Western blot analysis shows the levels of SAPK10 protein 1, 3 or 6 hours after addition of 100  $\mu$ M GA<sub>3</sub> or Paclobutrazol (a GA biosynthesis inhibitor). WT: wild type. (b-d) Western blot analysis shows the levels of SAPK10-GFP, SAPK8-GFP and SAPK9-GFP proteins 1, 3 or 6 hours after addition of 100  $\mu$ M GA<sub>3</sub> or Paclobutrazol. The 'α-HSP82' signal shows that roughly equal amounts of total plant extracts were used.

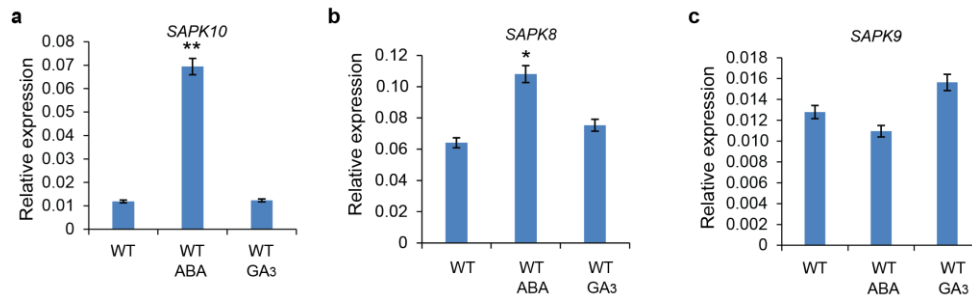

## Supplementary Figure 10

### Effects of ABA or GA on rice *SnRK2* mRNA expression.

(a-c) qRT-PCR results show that ABA can promote the expression of *SAPK10* (a) and *SAPK8* (b) but not *SAPK9* (c) in WT plants; but GA<sub>3</sub> does not substantially alter the expression of all three rice *SnRK2* genes (a-c) in WT plants. Values are means  $\pm$  s.d. (n=3 replicates). Asterisks mark significant differences according to Student's t test (\*P < 0.05, \*\*P < 0.01).

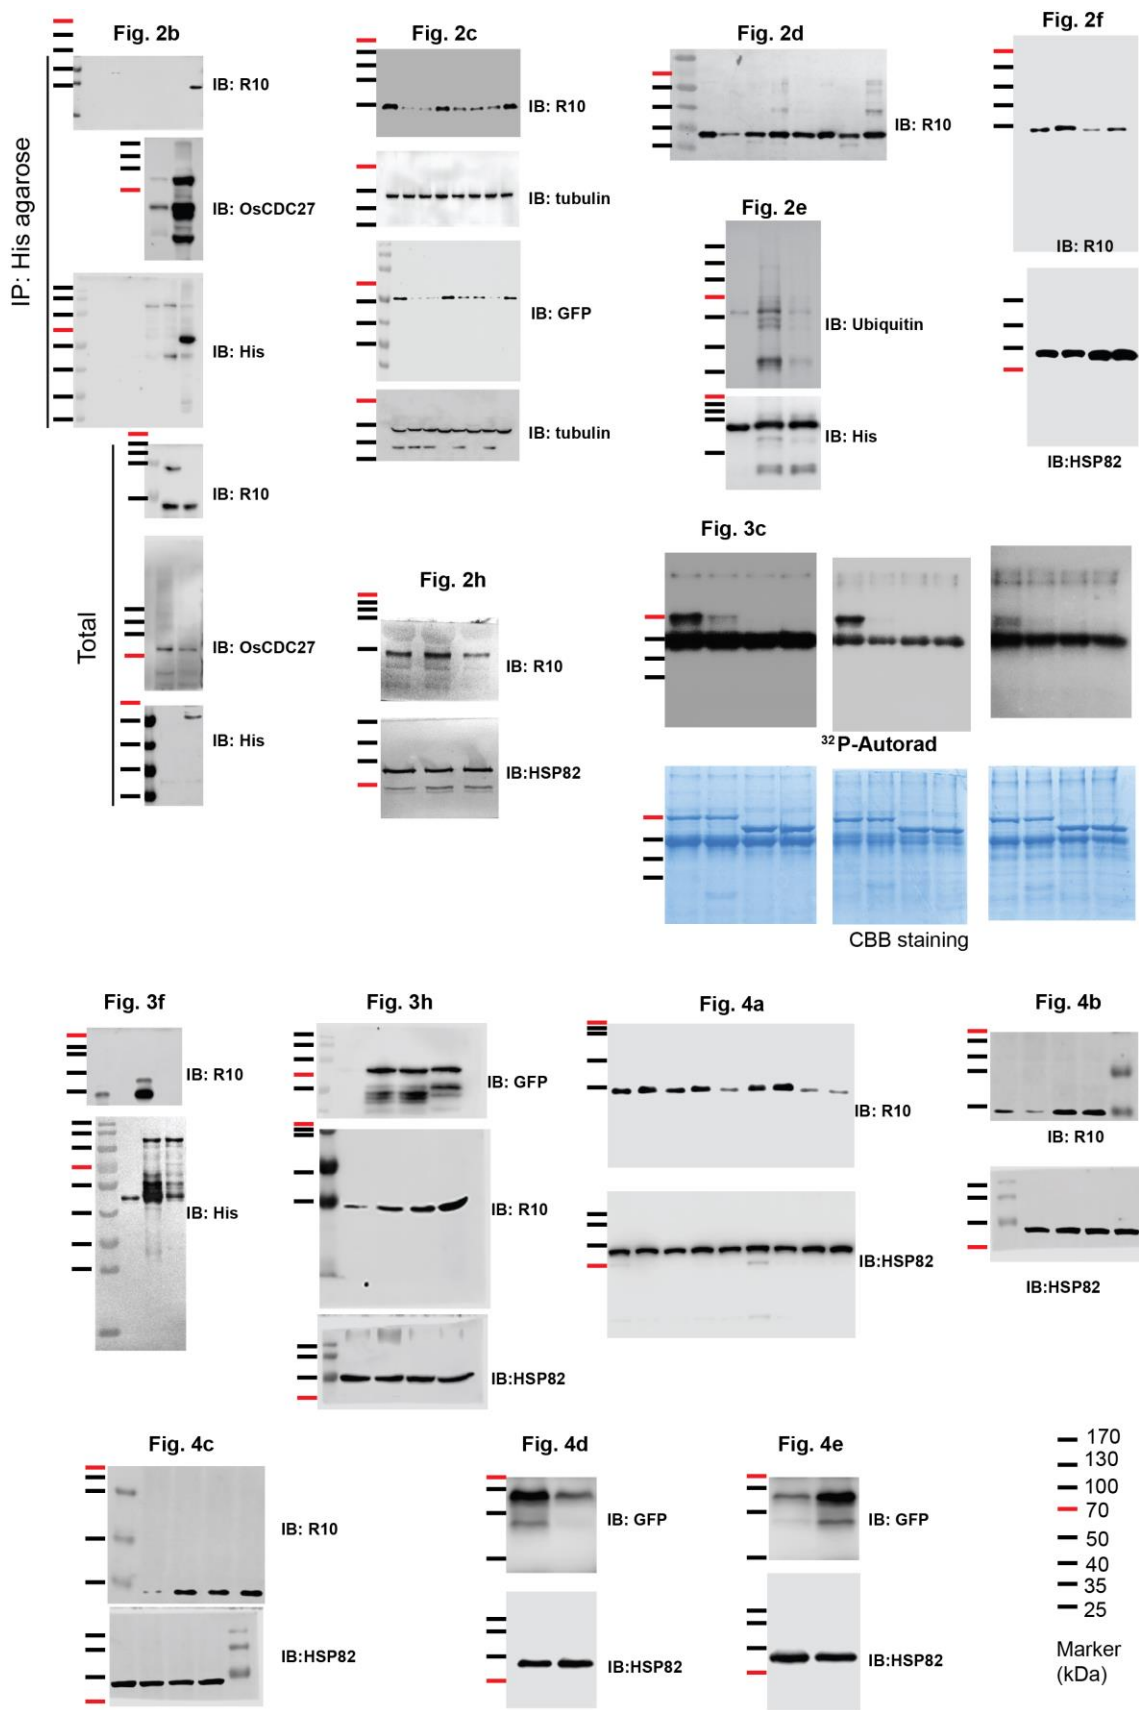

**Supplementary Figure 11**  
**Western blot scanned films.**

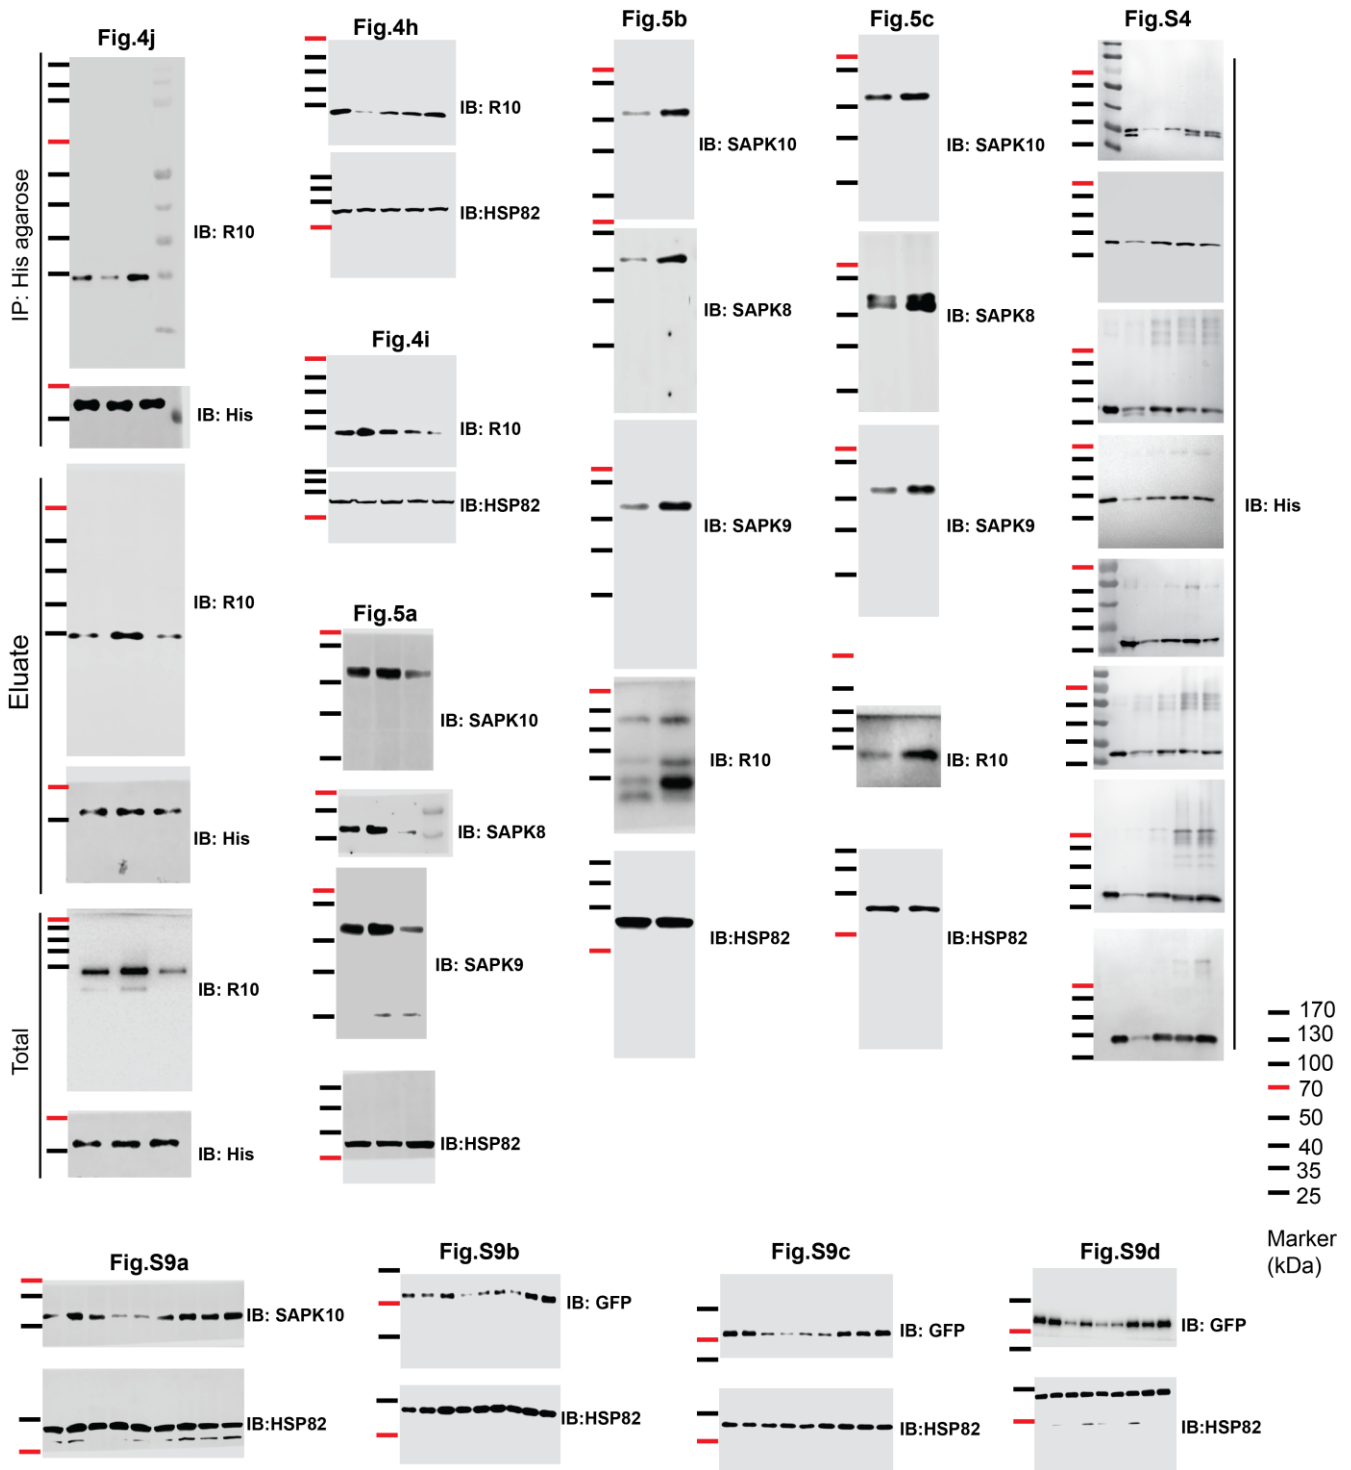

**Supplementary Figure 12**  
**Western blot scanned films.**

**Supplementary Table 1.** Primers used for construction of transgenic plasmids

|                             |                 |                                                                  |
|-----------------------------|-----------------|------------------------------------------------------------------|
| OsPYL/RCAR10 overexpression | RARC10- over- F | TCTGCACTAGGTACCTGCAGATGGAGCAGCAGGAGGAAG                          |
|                             | RARC10- over- R | ATGGATCCGTCGACCTGCAGTTCGCCGCCGCCGGTGGAG                          |
| OsPYL/RCAR10 RNAi           | RCAR10-S-F      | TTCTGCACTAGGTACCAGGCCTG ATGGAGCAGCAGGAGGAAGTG                    |
|                             | RCAR10-S-R      | CTGACGTAGGGGCGATAGAGCTC CTATTCCGCCGCCGCCGGTGGAG                  |
|                             | RCAR10-X-F      | CGGGGATCCGTCGACTAC ATGGAGCAGCAGGAGGAAGTG                         |
|                             | RCAR10-X-R      | AGGTGGAAGACGCGTTAC CTATTCCGCCGCCGCCGGTGGAG                       |
| SAPK Overexpression         | SAPK10-over-F   | TCTGCACTAGGTACCTGCAGATGGACCGGGCGGGCGCTGAC                        |
|                             | SAPK10-over-R   | ATGGATCCGTCGACCTGCAG<br>GTGGTGGTGGTGGTGGTGTTCACATAGCGTATACTATCTC |
|                             | SAPK8-over-F    | TCTGCACTAGGTACCTGCAGATGGCAGCGGGGGGGCCGG                          |
|                             | SAPK8-over-R    | ATGGATCCGTCGACCTGCAG<br>GTGGTGGTGGTGGTGGTGTTCATCGCATAGACGATCTC   |
|                             | SAPK9-over-F    | TCTGCACTAGGTACCTGCAGATGGAGAGGGCGGGCGGGGG                         |
|                             | SAPK9-over-R    | ATGGATCCGTCGACCTGCAG<br>GTGGTGGTGGTGGTGGTGTTCATGGCATATACGATCTC   |

**Supplementary Table 2. Primers used for construction of protein expression plasmids**

| Fragment                               | Forward primer (5' → 3')                                            | Reverse primer (5' → 3')                                                      |
|----------------------------------------|---------------------------------------------------------------------|-------------------------------------------------------------------------------|
| MBP-TE-His                             | TTCAGAATTCGGATCCATGGATCACCACCACCACCA<br>CCTG                        | CGACTCTAGAGGATCCTCAATGATGATGATGATGATGATGATGATGCCGGATGT<br>AGCTCCTAACAAATGATGT |
| MBP-TE(S77A)-His                       | Primer as above                                                     | Primer as above, PGEX-4t-1-TE (S77A) plasmid as the PCR template              |
| MBP-TE(S77D)-His                       | Primer as above                                                     | Primer as above, PGEX-4t-1-TE (S77D) plasmid as the PCR template              |
| MBP-TE <sub>N195</sub> -His            | AAGGACCATAGCATATATGCAtCAtCTtCCtCCtCCtCCtC<br>CtCGGTCCGCCGATGGAGAACT | TAGAGGATCCGAATTCTCAATGATGATGATGATGATGATGATGATGGCCAGTGC<br>CCCTCGTCTGT         |
| MBP-TE <sub>N195</sub> (S77A)-<br>His  | Primer as above                                                     | Primer as above, PGEX-4t-1-TE (S77A) plasmid as the PCR template              |
| MBP-TE <sub>C155</sub> -His            | TTCAGAATTCGGATCCCAACACTCGGCGCACCCGGT<br>ACTG                        | CGACTCTAGAGGATCCTCAATGATGATGATGATGATGATGATGCCGGATGT<br>AGCTCCTAACAAATGATGT    |
| MBP-TE <sub>C155</sub> (T457A)-<br>His | Primer as above                                                     | Primer as above, PGEX-4t-1-TE (T457A) plasmid as the PCR template             |
| GST-OsPYL/RACA<br>R10                  | TGGATCCCCGGAATTCATGGAGCAGCAGGAGGAAGT<br>G                           | GTCGACCCGGAATTCTATTCCGCCGCCGCCGGTGGAG                                         |
| His-OsPYL/RACA<br>R1                   | TCGCGGATCCGAATTCATGCAACCATCCACCTCTTGC                               | GACGGAGCTCGAATTCTCATGCATGATCGATCGATCCG                                        |
| His-OsPYL/RACA<br>R2                   | TCGCGGATCCGAATTCATGGAGCCCCACATGGAGAG                                | GACGGAGCTCGAATTCTAATGGTGGTTGCCGGCGG                                           |
| His-OsPYL/RACA<br>R3                   | TCGCGGATCCGAATTCATGGTGGAGGTGGGAGGAGG<br>AGC                         | GACGGAGCTCGAATTCTCACCGGTCGAGGGGCTCGGTT                                        |
| His-OsPYL/RACA<br>R4                   | TCGCGGATCCGAATTCATGCCGTGCATCCCGGCGTC<br>CA                          | GACGGAGCTCGAATTCTCACGAGCCGGCGGCCCTCGCGC                                       |
| His-OsPYL/RACA<br>R5                   | TCGCGGATCCGAATTCATGGTGGGGCTTGTGGGAGG<br>A                           | GACGGAGCTCGAATTCTACTGTTCAGTGGCGAGGTGGGT                                       |
| His-OsPYL/RACA<br>R6                   | TCGCGGATCCGAATTCATGCCGTACACCGCTCCACG<br>G                           | GACGGAGCTCGAATTCTTAGGCGGCGCGCGCGG                                             |
| His-OsPYL/RACA<br>R7                   | TCGCGGATCCGAATTCATGAACGGCGCTGGTGGTGC                                | GACGGAGCTCGAATTCTCAAGGATTGGCAAGGCGCTCCT                                       |
| His-OsPYL/RACA<br>R8                   | TCGCGGATCCGAATTCATGAACGGCGTTGGTGGGGC                                | GACGGAGCTCGAATTCTCAAGGATTGGCAAGGCGCTC                                         |
| His-OsPYL/RACA<br>R9                   | TCGCGGATCCGAATTCATGGAGGCGCACGTGGAGAG                                | GACGGAGCTCGAATTCTTAGTCGCGCCGCCGGAAGCA                                         |
| His-OsPYL/RACA<br>R10                  | TCGCGGATCCGAATTCATGGAGCAGCAGGAGGAAGT<br>G                           | GACGGAGCTCGAATTCTATTCCGCCGCCGCCGGTGGAG                                        |

|                                          |                                         |                                       |
|------------------------------------------|-----------------------------------------|---------------------------------------|
| D-box mutation in<br>His-OsPYL/RACAR10-m | GAGGCCCTCGACGCCCTCGACGACGC              | GGCGTCGAGGGCCTCGGTGCTGGT              |
| His-SAPK10                               | TCGCGGATCCGAATTCATGGACCGGGCGGCGCTGAC    | GACGGAGCTCGAATTCTCACATAGCGTATACTATCTC |
| His-SAPK8                                | TCGCGGATCCGAATTCATGGCAGCGGGGGGCCGG      | GACGGAGCTCGAATTCTTACATCGCATAGACGATCTC |
| His-SAPK9                                | TCGCGGATCCGAATTCATGGAGAGGGCGGCGCGG<br>G | GACGGAGCTCGAATTCTTACATGGCATATACGATCTC |
| GST-SAPK10                               | ATTAGAATTCATGGACCGGGCGGCGCTGAC          | GCCGCTCGAGTCACATAGCGTATACTATCT        |
| GST-SAPK8(217-361aa)                     | CCTTTCGAGGATCCTGAAGATCCCAA              | TTACATGGCATATACGATCTCTCCGCTGCTCTCAAT  |
| GST-SAPK9(207-371aa)                     | GCCGGAATCAAAGAATACGATGGCAAGAC           | GCGACTCGAGTTACATCGCATAGACGATCT        |

---



**Supplementary Table 3. Primers used for construction of BiFC plasmids**

| <b>Fragment</b> | <b>Forward primer (5' → 3')</b>            | <b>Reverse primer (5' → 3')</b>           |
|-----------------|--------------------------------------------|-------------------------------------------|
| SAPK8           | GCCTACTAGTGGATCC<br>ATGGACCGGGCGGCGCTGAC   | CGAGGTCGACGGATCC<br>TCACATAGCGTATACTATCTC |
| SAPK9           | GCCTACTAGTGGATCC<br>ATGGCAGCGGGCGGGGCCGG   | CGAGGTCGACGGATCC<br>TTACATCGCATAGACGATCTC |
| SAPK10          | GCCTACTAGTGGATCC<br>ATGGAGAGGGCGGCGGCGGG   | CGAGGTCGACGGATCC<br>TTACATGGCATATACGATCTC |
| R10             | CGATAGTACTGTCCGAC<br>ATGGAGCAGCAGGAGGAAGTG | TACCCTCGAGGTCGAC<br>TTCCGCCGCCCGGTGGAGGAG |

### Supplementary Table 4. Primers used in Real time Quantitative RT-PCR

| Gene<br>Name        | Primer sequences (5' → 3')   |                                 |
|---------------------|------------------------------|---------------------------------|
|                     | Forward primer               | Reverse primer                  |
| <i>Ubiquitin</i>    | ACCACTTCGACCGCCACTACT        | ACGCCTAAGCCTGCTGGTT             |
| <i>OsPYL/RCAR1</i>  | CTCCAGTCGCTTGCGCGAAC         | GATAAGTATGAAAAATAAAGAGCCCG      |
| <i>OsPYL/RCAR3</i>  | ACCTGGTTTGGTCTCTGGTGA        | GTGCTCATTGTCATCTAACAGCTC        |
| <i>OsPYL/RCAR4</i>  | CAAGAACTACCTCTCGGTCACCA      | AGGTTGCACTTGACGATGGTGT          |
| <i>OsPYL/RCAR5</i>  | GCACATCAAGGCTCCTGTTAC        | GTCTTGACGTTGACCTCGCGC           |
| <i>OsPYL/RCAR6</i>  | AGGTTGATGCTTATCGCTTCTTG      | TACTCTGTGTTGTCTACAAGCGAAA       |
| <i>OsPYL/RCAR8</i>  | AAACCTTTTGTGAGAACTGTGTAATG   | CTCTAACCTCTCAGTGCTCCTTGT        |
| <i>OsPYL/RCAR9</i>  | ACACCAGGATGTTACCGACAC        | GACGACGATTTATTGACGAGGC          |
| <i>OsPYL/RCAR10</i> | GCTCGCTCGACATCTTCTCACTCC     | GCCTCCACCGTCGCCCGCA             |
| <i>LEA3</i>         | GCCGTGAATGATTTCCCTTTG        | CACACCCGTCAGAAATCCTCC           |
| <i>LIP9</i>         | TGGAATTTGGAAGTGTGGC          | CCCACACGAAACACAACTTC            |
| <i>RAB16A</i>       | CATGGACAAGATCAAGGAGAAGC      | CTTATTATTCAGGAAGGTGACGTGG       |
| <i>SAPK10</i>       | GTGTGGAGTAACCCTCTACGTAATGCT  | TGATCTCGGGGATAGAGATTCTAGTG      |
| <i>SAPK8</i>        | TGAGATTATAAATCACCGATCGTTGAAA | AGCCTCATCTTCACTGAACCGTACATTC    |
| <i>SAPK9</i>        | AGCAACAATTCCAGCAGCAGGCACCA   | CTCAATGTCAAGGTCAAGGTCCGAGTCCATA |
